# Supplementary material for: Comparative analysis of microRNA profiles between adult Ascaris lumbricoides and Ascaris suum
Source: PubMed Central journal article supplement (PMC4021693; doi:10.1186/1746-6148-10-99), 2014-04-27
Supplement: 1746-6148-10-99-S2.pdf [file 1746-6148-10-99-S2.pdf]

```

-----AGCGGCACGCGAACUUGAGGUAAA----- t0102921 6
-----GCGGCACGCGAACUUGAGGUA----- t0252968 2
-----GCGGCACGCGAACUUGAGGUA----- t0057453 13
-----GCGGCACGCGAACUUGAGGUAAA----- t0630265 1
-----CGGCACGCGAACUUGAGGUA----- t0263691 2

```

## 2) Alu-miR-novel-053

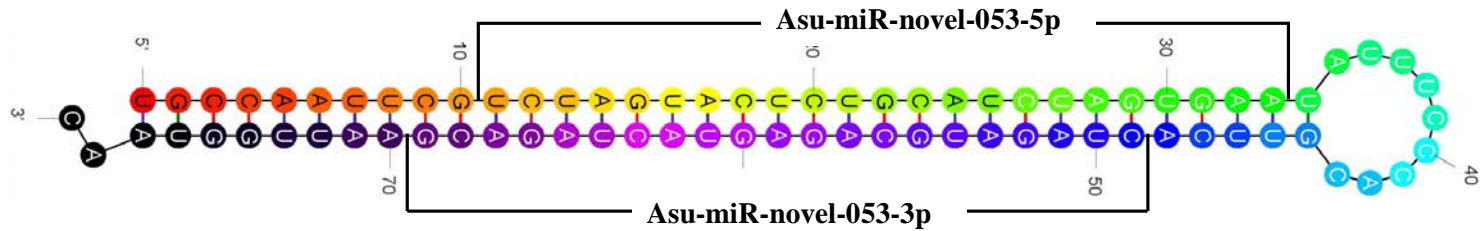

gi | 320297968 | gb | AEUI01023103.1 | :1933:2011:- 79(nt) -58.80(kcal/mol)

UGCCAAUUCGUCUAGUACUCUGCAUCUAGUGAAUUAUCCACGUUCACUAGAUGCAGAGUACUAGACGAAUUGGUAAC Alu-miR-novel-053 23

((((((((.....))))))))))..

\*\*\*\*\*UCUAGUACUCUGCAUCUAGUGAA\*\*\*\*\* Alu-miR-novel-053-5p 7

\*\*\*\*\*CUAGAUGCAGAGUACUAGACG\*\*\*\*\* Alu-miR-novel-053-3p 16

```

-----UCUAGUACUCUGCAUCUAGUGA----- t0476183 1
-----UCUAGUACUCUGCAUCUAGUGAA----- t0120476 5
-----UCUAGUACUCUGCAUCUAGUGAAU----- t0515075 1
-----ACUAGAUGCAGAGUACUA----- t1272648 1
-----ACUAGAUGCAGAGUACUAGACG----- t1631272 1
-----CUAGAUGCAGAGUACUAGA----- t1370274 1
-----CUAGAUGCAGAGUACUAGAC----- t1157625 1
-----CUAGAUGCAGAGUACUAGACG----- t0062033 12

```
